# Supplementary material for: A Novel Panel of 43 Insertion/Deletion Loci for Human Identifications of Forensic Degraded DNA Samples: Development and Validation
Source: Front Genet. 2021 Mar 11;12:610540. doi: 10.3389/fgene.2021.610540 (PMC7990895; doi:10.3389/fgene.2021.610540)
Supplement: Supplementary Table 1 — Allelic frequencies of 43 InDel loci in 26 reference groups and Chinese Hui groups. [file Table_1.xlsx]

## Sheet: Sheet1
Supplementary Table 1. Allelic frequencies of 43 InDel loci in 26 reference groups and Chinese Hui groups.
Populations	Abbreviation	Region	Sample sizes	rs10533337		rs10537321		rs10540867		rs10541072		rs10544053		rs10555133		rs10555434		rs10573809		rs10584875		rs10588341		rs10589141		rs140025863		rs142159306		rs142281120		rs142392113		rs142623177		rs144537609		rs146880183		rs147682692		rs16646		rs201844336		rs3036240		rs3043804
				Insertion	Deletion	Insertion	Deletion	Insertion	Deletion	Insertion	Deletion	Insertion	Deletion	Insertion	Deletion	Insertion	Deletion	Insertion	Deletion	Insertion	Deletion	Insertion	Deletion	Insertion	Deletion	Insertion	Deletion	Insertion	Deletion	Insertion	Deletion	Insertion	Deletion	Insertion	Deletion	Insertion	Deletion	Insertion	Deletion	Insertion	Deletion	Insertion	Deletion	Insertion	Deletion	Insertion	Deletion	Insertion	Deletion
African Caribbean in Barbados	ACB	Africa	96	0.5	0.5	0.7969	0.2031	0.7083	0.2917	0.1563	0.8438	0.3646	0.6354	0.4583	0.5417	0.5938	0.4063	0.5156	0.4844	0.3802	0.6198	0.5313	0.4688	0.2292	0.7708	0.3594	0.6406	0.4323	0.5677	0.5104	0.4896	0.8594	0.1406	0.474	0.526	0.5208	0.4792	0.4635	0.5365	0.2552	0.7448	0.8646	0.1354	0.6406	0.3594	0.2813	0.7188	0.4948	0.5052
African Ancestry in Southwest	ASW	Africa	61	0.5164	0.4836	0.7295	0.2705	0.7049	0.2951	0.2213	0.7787	0.459	0.541	0.4672	0.5328	0.5738	0.4262	0.4836	0.5164	0.3443	0.6557	0.5738	0.4262	0.2623	0.7377	0.377	0.623	0.3852	0.6148	0.418	0.582	0.7623	0.2377	0.418	0.582	0.5738	0.4262	0.3607	0.6393	0.2541	0.7459	0.8033	0.1967	0.5902	0.4098	0.3115	0.6885	0.5492	0.4508
Esan in Nigeria	ESN	Africa	99	0.6313	0.3687	0.7626	0.2374	0.8485	0.1515	0.1263	0.8737	0.2778	0.7222	0.5202	0.4798	0.5455	0.4545	0.5202	0.4798	0.4242	0.5758	0.5758	0.4242	0.1566	0.8434	0.4091	0.5909	0.404	0.596	0.5404	0.4596	0.9293	0.0707	0.4242	0.5758	0.601	0.399	0.404	0.596	0.1869	0.8131	0.904	0.096	0.6717	0.3283	0.2879	0.7121	0.5505	0.4495
Gambian in Western Division	GWD	Africa	113	0.5575	0.4425	0.677	0.323	0.8186	0.1814	0.0664	0.9336	0.4779	0.5221	0.4867	0.5133	0.5664	0.4336	0.6106	0.3894	0.4071	0.5929	0.5	0.5	0.1681	0.8319	0.3805	0.6195	0.3805	0.6195	0.5088	0.4912	0.8186	0.1814	0.5044	0.4956	0.5398	0.4602	0.4115	0.5885	0.2345	0.7655	0.8894	0.1106	0.8009	0.1991	0.2611	0.7389	0.5664	0.4336
Luhya in Webuye, Kenya	LWK	Africa	99	0.5606	0.4394	0.803	0.197	0.7626	0.2374	0.1111	0.8889	0.3889	0.6111	0.5707	0.4293	0.4596	0.5404	0.5556	0.4444	0.5404	0.4596	0.5152	0.4848	0.1212	0.8788	0.3182	0.6818	0.3737	0.6263	0.4343	0.5657	0.9192	0.0808	0.4394	0.5606	0.5101	0.4899	0.4394	0.5606	0.2273	0.7727	0.7778	0.2222	0.7424	0.2576	0.3182	0.6818	0.5404	0.4596
Mende in Sierra	MSL	Africa	85	0.4529	0.5471	0.7941	0.2059	0.7941	0.2059	0.0765	0.9235	0.4059	0.5941	0.5059	0.4941	0.6529	0.3471	0.5765	0.4235	0.3647	0.6353	0.5471	0.4529	0.2176	0.7824	0.4882	0.5118	0.3118	0.6882	0.4412	0.5588	0.9353	0.0647	0.4412	0.5588	0.6529	0.3471	0.4059	0.5941	0.1235	0.8765	0.8824	0.1176	0.7235	0.2765	0.2176	0.7824	0.4765	0.5235
Yoruba in Ibadan	YRI	Africa	108	0.5185	0.4815	0.8009	0.1991	0.8194	0.1806	0.125	0.875	0.3843	0.6157	0.4954	0.5046	0.6389	0.3611	0.588	0.412	0.3287	0.6713	0.5787	0.4213	0.125	0.875	0.3704	0.6296	0.4074	0.5926	0.4352	0.5648	0.9074	0.0926	0.5	0.5	0.5046	0.4954	0.3704	0.6296	0.1713	0.8287	0.9167	0.0833	0.625	0.375	0.2639	0.7361	0.5139	0.4861
Colombian in Medellin, Colombia	CLM	America	94	0.4734	0.5266	0.4734	0.5266	0.4096	0.5904	0.5053	0.4947	0.4149	0.5851	0.5691	0.4309	0.5851	0.4149	0.4521	0.5479	0.3404	0.6596	0.5585	0.4415	0.4894	0.5106	0.4947	0.5053	0.4255	0.5745	0.3191	0.6809	0.4415	0.5585	0.4894	0.5106	0.3777	0.6223	0.4468	0.5532	0.4947	0.5053	0.4947	0.5053	0.5	0.5	0.4309	0.5691	0.4947	0.5053
Mexican Ancestry in Los Angeles	MXL	America	64	0.6094	0.3906	0.5234	0.4766	0.5859	0.4141	0.6172	0.3828	0.5234	0.4766	0.5078	0.4922	0.5156	0.4844	0.4609	0.5391	0.4219	0.5781	0.3828	0.6172	0.5313	0.4688	0.7422	0.2578	0.3516	0.6484	0.3281	0.6719	0.4453	0.5547	0.5234	0.4766	0.2344	0.7656	0.4922	0.5078	0.4609	0.5391	0.4688	0.5313	0.4297	0.5703	0.5234	0.4766	0.6094	0.3906
Peruvian in Lima	PEL	America	85	0.5294	0.4706	0.7294	0.2706	0.7294	0.2706	0.7765	0.2235	0.4588	0.5412	0.5941	0.4059	0.6824	0.3176	0.6471	0.3529	0.2706	0.7294	0.3824	0.6176	0.5	0.5	0.7706	0.2294	0.3824	0.6176	0.2706	0.7294	0.6	0.4	0.5471	0.4529	0.0941	0.9059	0.4588	0.5412	0.4118	0.5882	0.5412	0.4588	0.4294	0.5706	0.6647	0.3353	0.7882	0.2118
Puerto Rican in Puerto Rico	PUR	America	104	0.4423	0.5577	0.5337	0.4663	0.4856	0.5144	0.4712	0.5288	0.4135	0.5865	0.524	0.476	0.4423	0.5577	0.4135	0.5865	0.4087	0.5913	0.4423	0.5577	0.5288	0.4712	0.4615	0.5385	0.4231	0.5769	0.5481	0.4519	0.4952	0.5048	0.5865	0.4135	0.3894	0.6106	0.3462	0.6538	0.4904	0.5096	0.5385	0.4615	0.4952	0.5048	0.5	0.5	0.4567	0.5433
Chinese Dai in Xishuangbanna	CDX	East Asia	93	0.6882	0.3118	0.586	0.414	0.6022	0.3978	0.5806	0.4194	0.3871	0.6129	0.5161	0.4839	0.3226	0.6774	0.5538	0.4462	0.4247	0.5753	0.5215	0.4785	0.6075	0.3925	0.4194	0.5806	0.4355	0.5645	0.5538	0.4462	0.5323	0.4677	0.3602	0.6398	0.4355	0.5645	0.6022	0.3978	0.4624	0.5376	0.3602	0.6398	0.4785	0.5215	0.4462	0.5538	0.5699	0.4301
Han Chinese in Beijing	CHB	East Asia	103	0.5388	0.4612	0.4466	0.5534	0.4223	0.5777	0.5631	0.4369	0.5146	0.4854	0.5437	0.4563	0.4563	0.5437	0.5	0.5	0.4563	0.5437	0.5097	0.4903	0.5437	0.4563	0.4806	0.5194	0.4272	0.5728	0.4903	0.5097	0.5194	0.4806	0.3932	0.6068	0.5971	0.4029	0.4417	0.5583	0.4854	0.5146	0.4029	0.5971	0.3883	0.6117	0.432	0.568	0.5	0.5
Southern Han Chinese	CHS	East Asia	105	0.5857	0.4143	0.5238	0.4762	0.4429	0.5571	0.5571	0.4429	0.5	0.5	0.5571	0.4429	0.419	0.581	0.5048	0.4952	0.4333	0.5667	0.5143	0.4857	0.5857	0.4143	0.519	0.481	0.4143	0.5857	0.5048	0.4952	0.5571	0.4429	0.4524	0.5476	0.5714	0.4286	0.4952	0.5048	0.4905	0.5095	0.4381	0.5619	0.4	0.6	0.4762	0.5238	0.5667	0.4333
Japanese in Tokyo	JPT	East Asia	104	0.5481	0.4519	0.5337	0.4663	0.5433	0.4567	0.5865	0.4135	0.4663	0.5337	0.4615	0.5385	0.4615	0.5385	0.5673	0.4327	0.4567	0.5433	0.5048	0.4952	0.4904	0.5096	0.5337	0.4663	0.4712	0.5288	0.4567	0.5433	0.4471	0.5529	0.5385	0.4615	0.5144	0.4856	0.4279	0.5721	0.4519	0.5481	0.524	0.476	0.4471	0.5529	0.4519	0.5481	0.4712	0.5288
Kinh in Ho Chi Minh City, Vietnam	KHV	East Asia	99	0.5404	0.4596	0.5758	0.4242	0.4798	0.5202	0.6212	0.3788	0.404	0.596	0.4545	0.5455	0.404	0.596	0.4899	0.5101	0.4394	0.5606	0.5606	0.4394	0.5253	0.4747	0.5253	0.4747	0.3687	0.6313	0.5	0.5	0.5556	0.4444	0.3737	0.6263	0.5253	0.4747	0.5152	0.4848	0.4848	0.5152	0.4091	0.5909	0.3586	0.6414	0.4848	0.5152	0.5707	0.4293
Hui group in northwest Chinese	XJH	East Asia	533	0.5535	0.4465	0.47	0.53	0.4634	0.5366	0.5394	0.4606	0.4156	0.5844	0.5835	0.4165	0.4522	0.5478	0.4944	0.5056	0.5122	0.4878	0.4859	0.5141	0.5009	0.4991	0.485	0.515	0.4803	0.5197	0.4756	0.5244	0.4878	0.5122	0.4522	0.5478	0.5891	0.4109	0.3996	0.6004	0.4869	0.5131	0.4578	0.5422	0.4015	0.5985	0.3968	0.6032	0.4831	0.5169
Northern and Western European ancestry	CEU	Europe	99	0.3434	0.6566	0.3939	0.6061	0.2475	0.7525	0.4848	0.5152	0.4091	0.5909	0.601	0.399	0.4596	0.5404	0.3333	0.6667	0.3636	0.6364	0.4747	0.5253	0.7121	0.2879	0.4596	0.5404	0.5303	0.4697	0.7121	0.2879	0.3737	0.6263	0.5556	0.4444	0.4141	0.5859	0.3081	0.6919	0.5404	0.4596	0.3535	0.6465	0.4192	0.5808	0.4596	0.5404	0.3737	0.6263
Finnish in Finland	FIN	Europe	99	0.4192	0.5808	0.3384	0.6616	0.3889	0.6111	0.5303	0.4697	0.4192	0.5808	0.5455	0.4545	0.4242	0.5758	0.2525	0.7475	0.4899	0.5101	0.4495	0.5505	0.5606	0.4394	0.4949	0.5051	0.4495	0.5505	0.4697	0.5303	0.4343	0.5657	0.5202	0.4798	0.4949	0.5051	0.3283	0.6717	0.4848	0.5152	0.3485	0.6515	0.3939	0.6061	0.4141	0.5859	0.5253	0.4747
British in England and Scotland	GBR	Europe	91	0.3516	0.6484	0.4176	0.5824	0.2747	0.7253	0.5165	0.4835	0.4176	0.5824	0.6538	0.3462	0.5385	0.4615	0.2747	0.7253	0.3846	0.6154	0.4121	0.5879	0.6209	0.3791	0.4286	0.5714	0.4286	0.5714	0.6429	0.3571	0.3516	0.6484	0.5	0.5	0.4396	0.5604	0.3407	0.6593	0.544	0.456	0.3516	0.6484	0.456	0.544	0.4066	0.5934	0.3462	0.6538
Iberian populations in Spain	IBS	Europe	107	0.4065	0.5935	0.3692	0.6308	0.3178	0.6822	0.3551	0.6449	0.3692	0.6308	0.5561	0.4439	0.4159	0.5841	0.3411	0.6589	0.3972	0.6028	0.4626	0.5374	0.6028	0.3972	0.4065	0.5935	0.486	0.514	0.5047	0.4953	0.3505	0.6495	0.4579	0.5421	0.3692	0.6308	0.3645	0.6355	0.5514	0.4486	0.3505	0.6495	0.3879	0.6121	0.3925	0.6075	0.4112	0.5888
Toscani in Italy	TSI	Europe	107	0.4252	0.5748	0.3785	0.6215	0.3692	0.6308	0.4159	0.5841	0.4299	0.5701	0.6308	0.3692	0.4346	0.5654	0.4065	0.5935	0.3832	0.6168	0.4112	0.5888	0.6729	0.3271	0.3879	0.6121	0.5	0.5	0.5234	0.4766	0.3411	0.6589	0.5	0.5	0.3738	0.6262	0.3178	0.6822	0.5607	0.4393	0.3972	0.6028	0.3645	0.6355	0.4299	0.5701	0.472	0.528
Bengali in Bangladesh	BEB	South Asia	86	0.5698	0.4302	0.5116	0.4884	0.593	0.407	0.4419	0.5581	0.3721	0.6279	0.4302	0.5698	0.5174	0.4826	0.7093	0.2907	0.5756	0.4244	0.5581	0.4419	0.3547	0.6453	0.436	0.564	0.5058	0.4942	0.5058	0.4942	0.1977	0.8023	0.5698	0.4302	0.564	0.436	0.4651	0.5349	0.5174	0.4826	0.3779	0.6221	0.436	0.564	0.5	0.5	0.5814	0.4186
Gujarati Indian in Houston	GIH	South Asia	103	0.6359	0.3641	0.4951	0.5049	0.6456	0.3544	0.3932	0.6068	0.3689	0.6311	0.5	0.5	0.568	0.432	0.6068	0.3932	0.6214	0.3786	0.4951	0.5049	0.2524	0.7476	0.4175	0.5825	0.6311	0.3689	0.5534	0.4466	0.3252	0.6748	0.6748	0.3252	0.4515	0.5485	0.4757	0.5243	0.5146	0.4854	0.335	0.665	0.4466	0.5534	0.4029	0.5971	0.534	0.466
ndian Telugu in the UK	ITU	South Asia	102	0.6275	0.3725	0.5245	0.4755	0.6667	0.3333	0.4657	0.5343	0.4216	0.5784	0.4265	0.5735	0.5588	0.4412	0.5735	0.4265	0.5931	0.4069	0.5245	0.4755	0.3186	0.6814	0.4706	0.5294	0.5931	0.4069	0.5049	0.4951	0.2745	0.7255	0.5098	0.4902	0.3971	0.6029	0.3725	0.6275	0.5686	0.4314	0.348	0.652	0.4265	0.5735	0.5	0.5	0.5784	0.4216
Punjabi in Lahore	PJL	South Asia	96	0.5781	0.4219	0.4427	0.5573	0.6042	0.3958	0.4375	0.5625	0.474	0.526	0.4479	0.5521	0.526	0.474	0.4844	0.5156	0.5833	0.4167	0.5208	0.4792	0.3438	0.6563	0.4583	0.5417	0.5781	0.4219	0.5365	0.4635	0.3281	0.6719	0.5104	0.4896	0.4844	0.5156	0.3698	0.6302	0.526	0.474	0.4375	0.5625	0.3542	0.6458	0.4688	0.5313	0.5677	0.4323
Sri Lankan Tamil in the UK	STU	South Asia	102	0.6225	0.3775	0.6275	0.3725	0.701	0.299	0.4706	0.5294	0.4118	0.5882	0.4167	0.5833	0.5392	0.4608	0.5784	0.4216	0.549	0.451	0.5049	0.4951	0.3284	0.6716	0.4265	0.5735	0.5588	0.4412	0.5588	0.4412	0.2745	0.7255	0.5098	0.4902	0.3137	0.6863	0.5343	0.4657	0.5588	0.4412	0.3873	0.6127	0.402	0.598	0.4902	0.5098	0.6078	0.3922
[truncated: 40 more columns]
